# Supplementary material for: Highly selective hydrogenation of aromatic ketones to alcohols in water: effect of PdO and ZrO2
Source: Royal Society of Chemistry journal article supplement (doi:10.1039/d1dt01842f), 2021-01-01
Supplement: d1dt01842f1.pdf [file d1dt01842f1.pdf]

## Supporting Information

### Highly selective hydrogenation of aromatic ketones to alcohols in water: effect of PdO and ZrO<sub>2</sub>.

W. Alsalahi, W. Tylus, A.M. Trzeciak

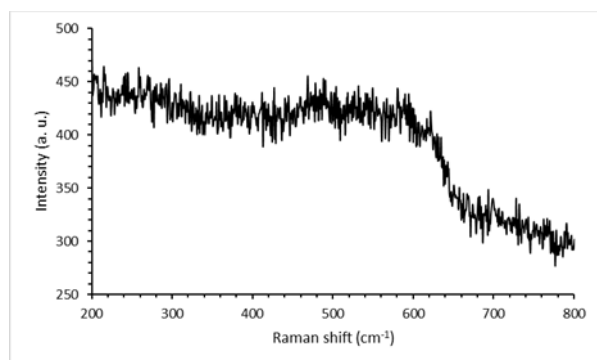

Figure S1. Raman spectrum of ZrO<sub>2</sub>.

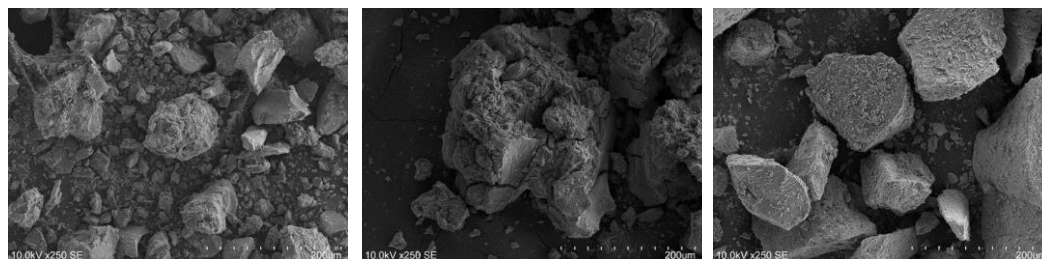

Figure S2. SEM images of a) **I**, b) **II** and c) **III**.

Table S1. The EDX analysis of catalysts **I**, **II** and **III**.

| Catalyst   | Atom % |     |      |     |     |     |
|------------|--------|-----|------|-----|-----|-----|
|            | C      | N   | O    | Na  | Zr  | Pd  |
| <b>I</b>   | 31.6   | 9.2 | 49.4 | 1.7 | 5.6 | 2.5 |
| <b>II</b>  | 7      | 6.5 | 61.4 | 3.3 | 14  | 7.8 |
| <b>III</b> | 17.7   | 4.5 | 58.6 | 8.5 | 7.4 | 3.3 |

Table S2. XPS surface composition, atom %.

|                                      | <b>Pd</b><br>Pd 3d5/2 | <b>O</b><br>O 1s | <b>Zr</b><br>Zr 3d | <b>C</b><br>C 1s | <b>Pd/Zr</b> |
|--------------------------------------|-----------------------|------------------|--------------------|------------------|--------------|
| <b>I</b>                             | 18.5                  | 22.8             | 12.9               | 45.8             | 1.43         |
| <b>II</b>                            | 4.8                   | 46               | 21.5               | 27.7             | 0.22         |
| <b>III</b>                           | 7.2                   | 41.5             | 13                 | 38.3             | 0.55         |
| ZrO <sub>2</sub> /Zr <sub>foil</sub> |                       | 51.0             | 26.0               | 23.0             |              |

Table S3. Hydrogenation of AP in different solvents.

| Entry | Catalyst | pH <sub>2</sub> , bar | T, °C | t | Solvent | Conv. % | PE, % | EB % |
|-------|----------|-----------------------|-------|---|---------|---------|-------|------|
| 1     | II       | 10                    | 80    | 1 | MeOH    | 6       | 6     | 0    |
| 2     |          | 10                    | 80    | 1 | Anisole | 12      | 12    | 0    |

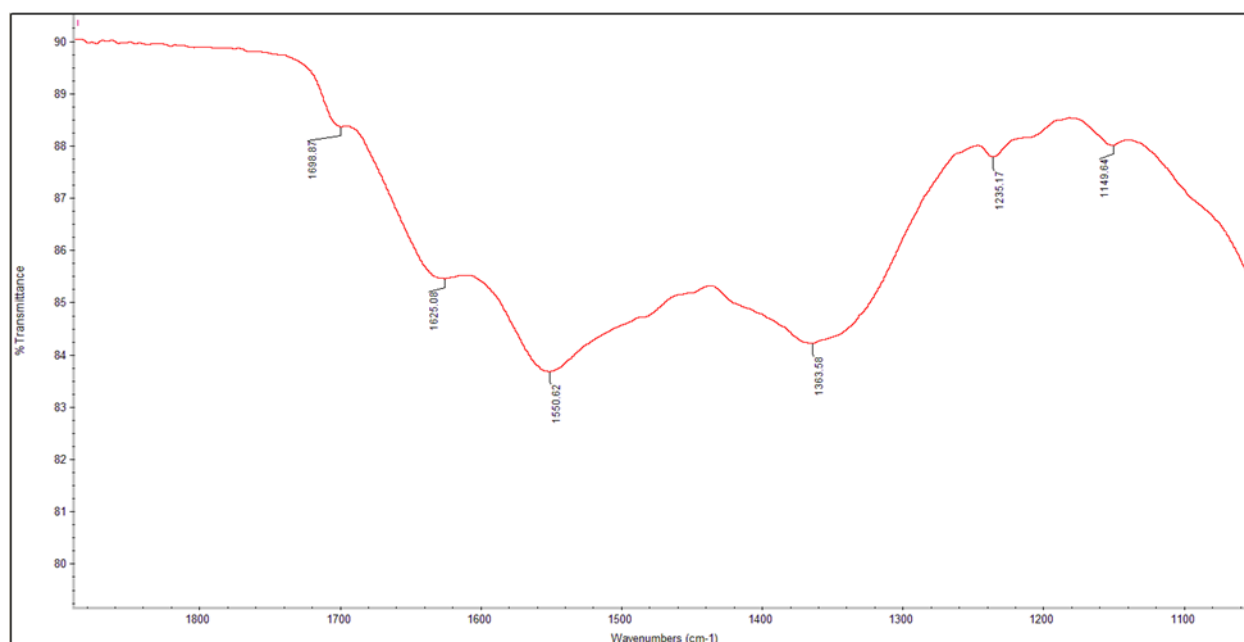

Figure S3. ATR-FTIR spectrum of AP adsorbed on catalyst **I**. (Catalyst **I** (10 mg) was mixed with AP (0.015 mL) in water (1 mL) for 24 h. Next, **I** was separated by centrifugation and dried under N<sub>2</sub>).

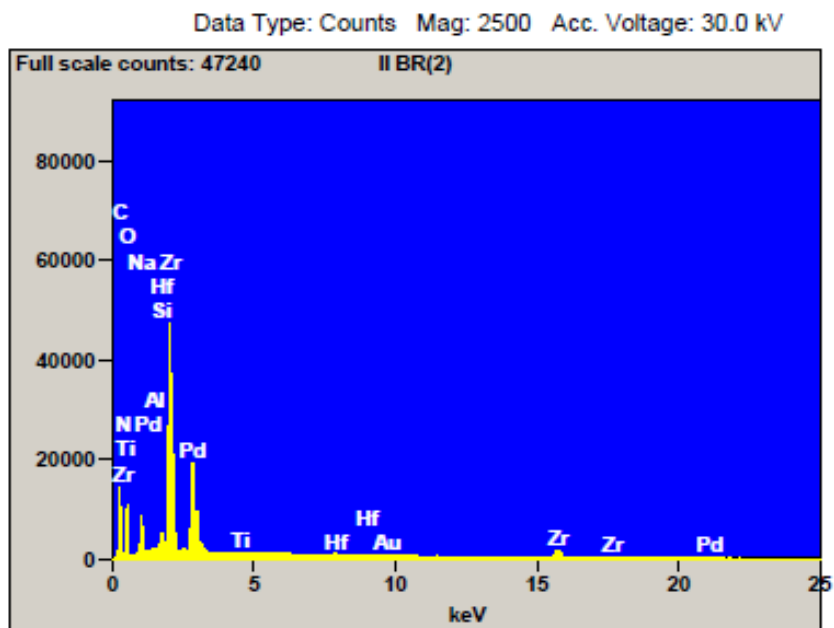

Figure S 4. EDS spectrum of catalyst II before reaction.

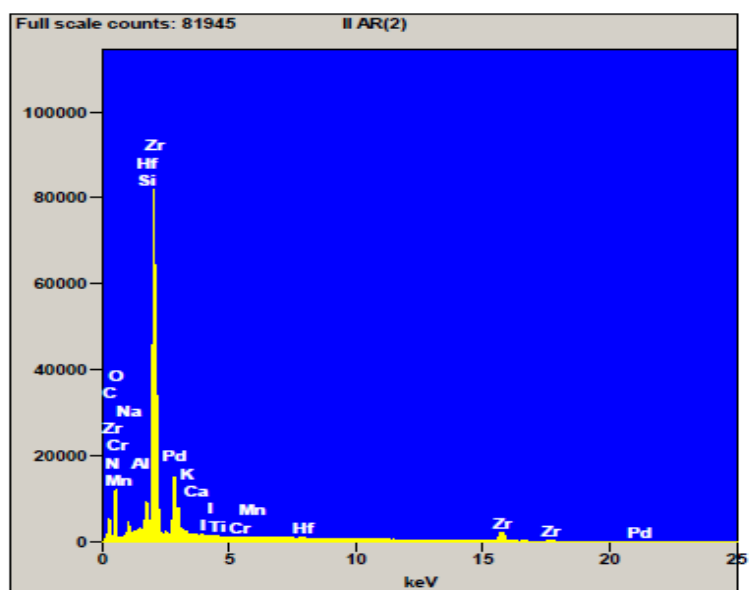

Figure S 5. EDS spectrum of catalyst II after reaction.

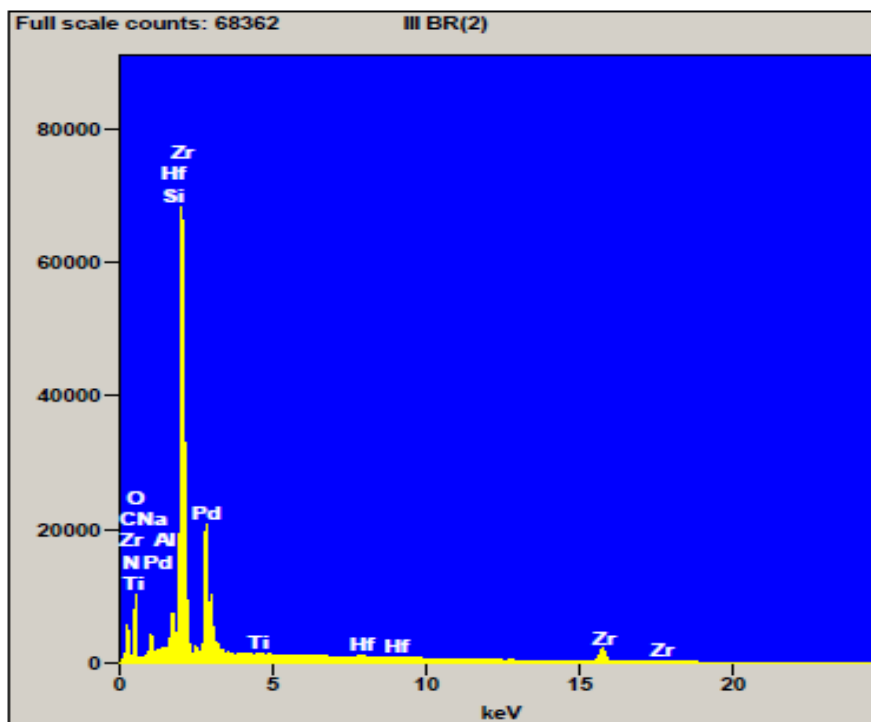

Figure S 6. EDS spectrum of catalyst III before reaction.

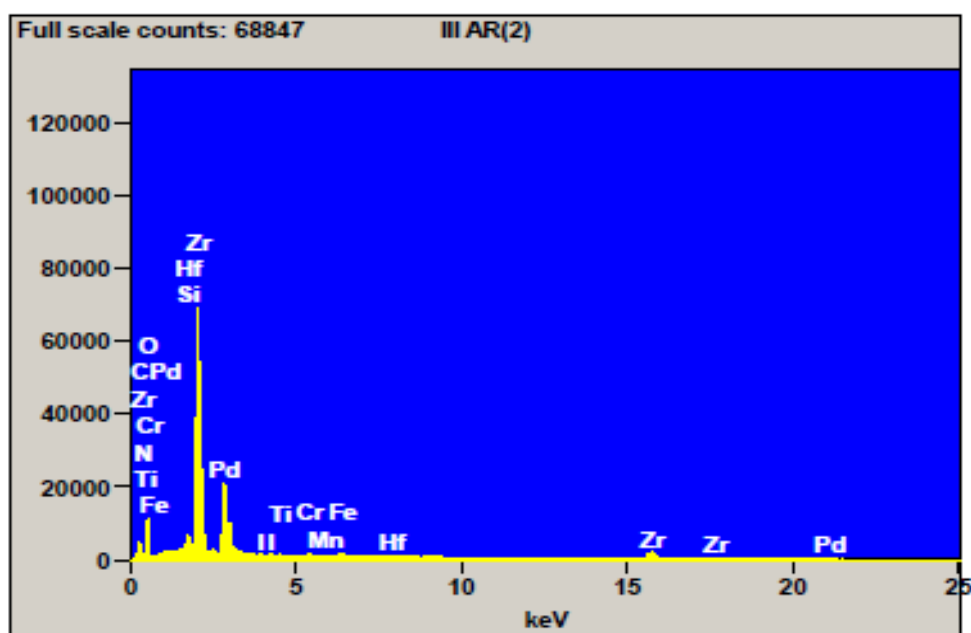

Figure S 7. EDS spectrum of catalyst III after reaction.

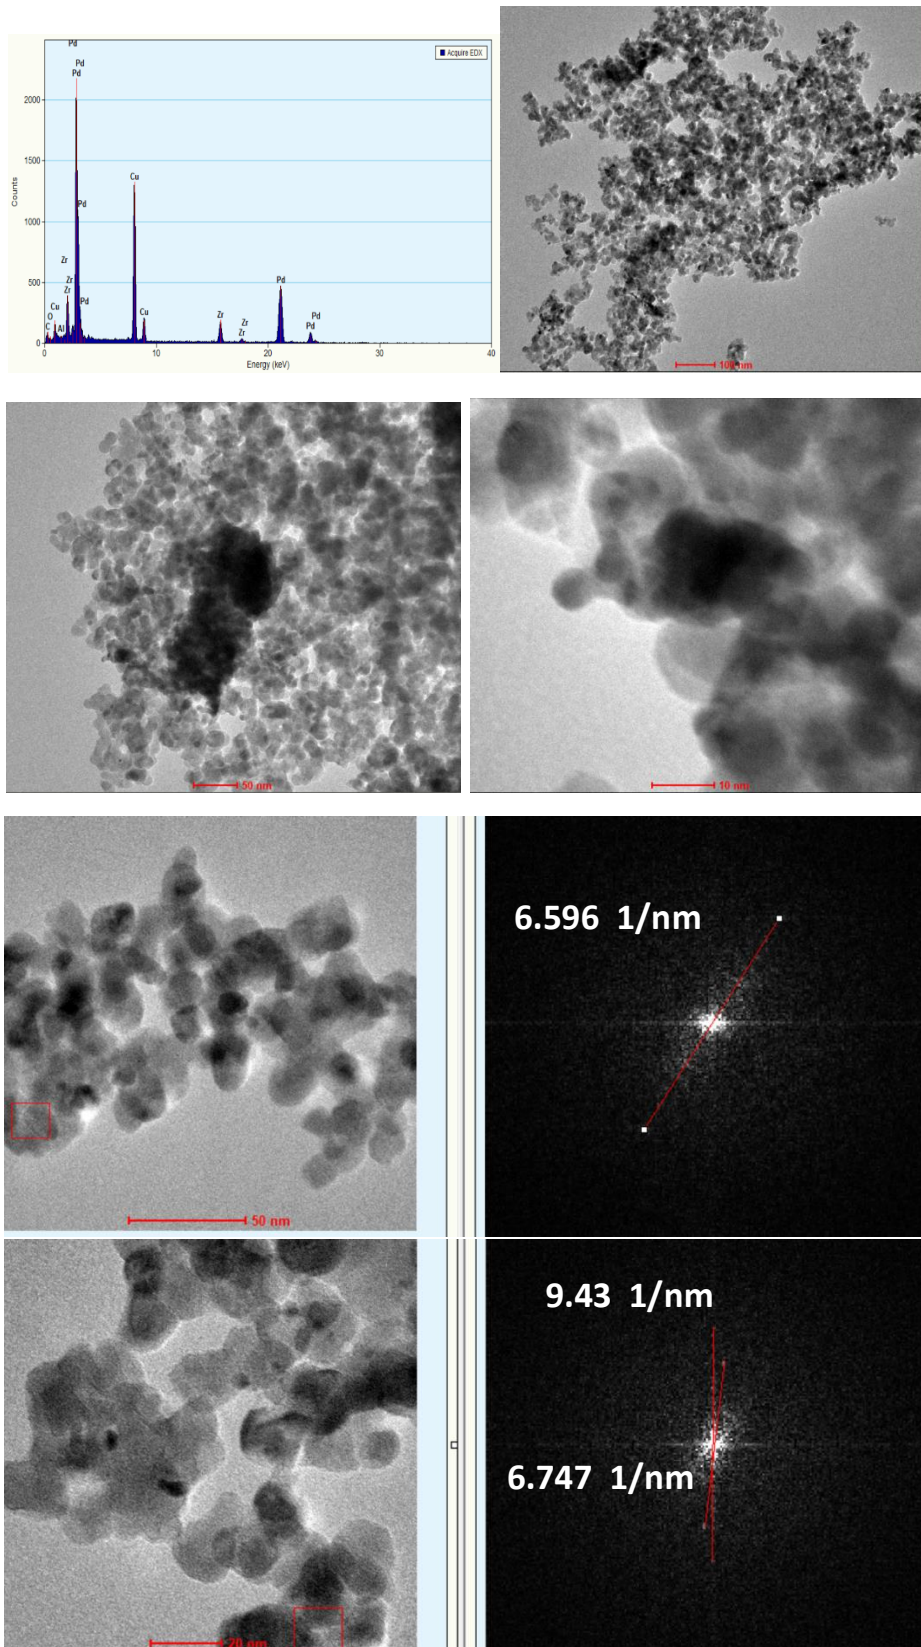

Figure S 8. EDX spectrum and TEM images of catalyst II after recycling reaction.

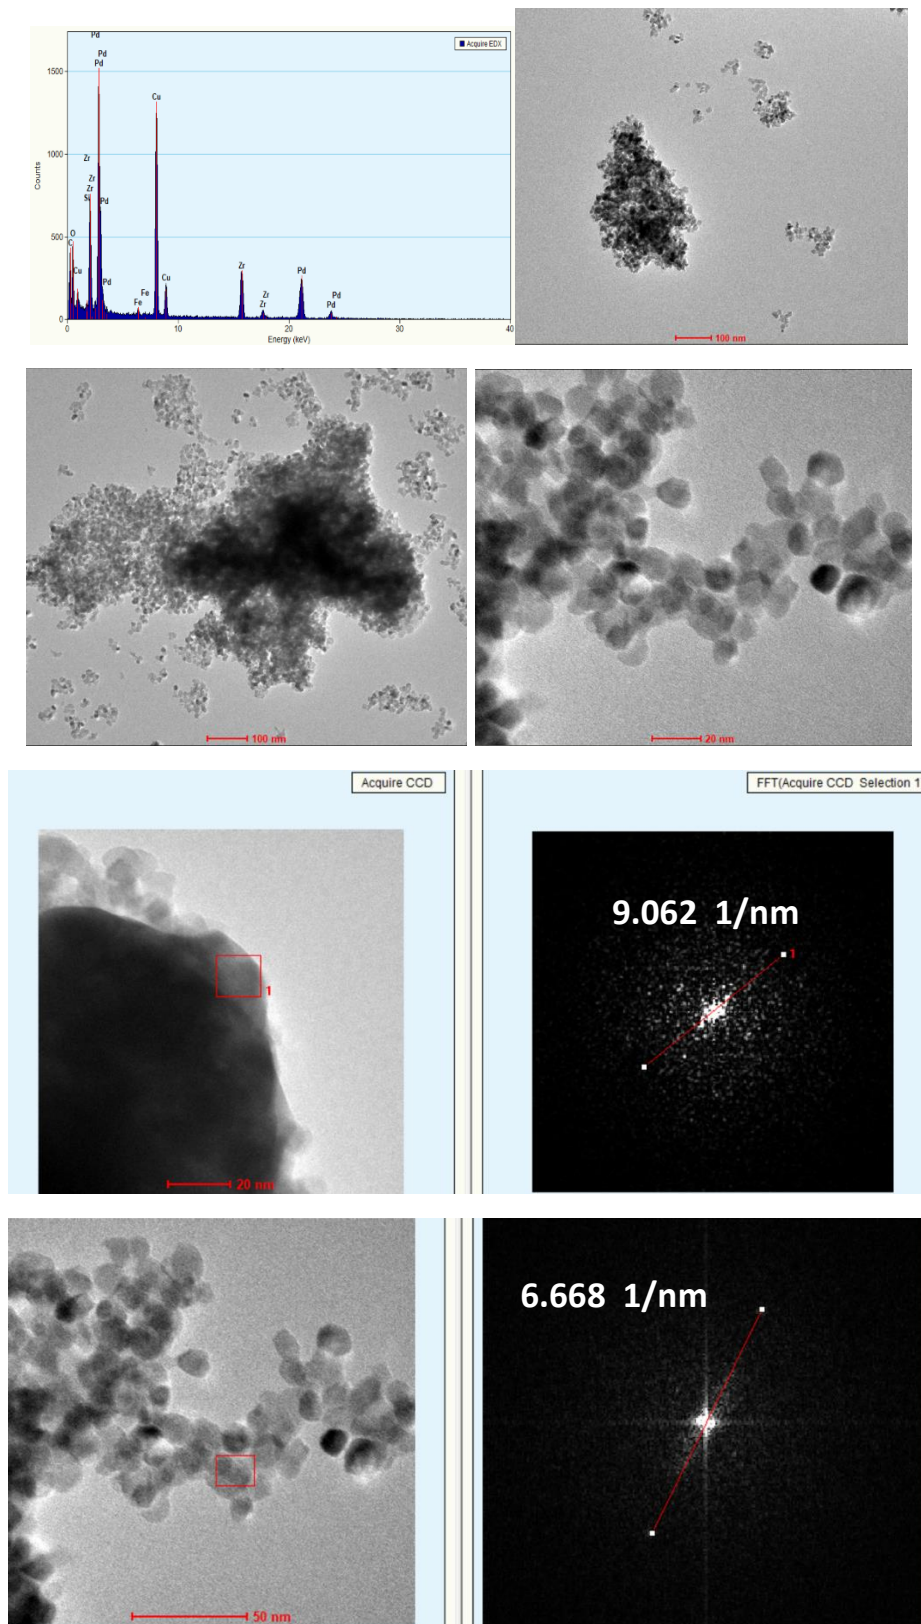

Figure S 9. EDX spectrum and TEM images of catalyst III after recycling experiment.

Table S4. Hydrogenation of differently substituted acetophenones catalyzed by I and II

| Entry           | Substrate                                                                           | Catalyst  | Product                                                                                                                                                                    | Conv.% | Yield %    |
|-----------------|-------------------------------------------------------------------------------------|-----------|----------------------------------------------------------------------------------------------------------------------------------------------------------------------------|--------|------------|
| 1               | 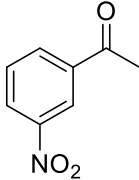   | <b>I</b>  |                                                                                           | 100    | 93/1.5/5.5 |
| 2               |    | <b>II</b> |                                                                                           | 88     | 1/87/0     |
| 3 <sup>a</sup>  |                                                                                     |           |                                                                                          | 100    | 95/4.5/0.5 |
| 4               |    | <b>I</b>  |                                                                                           | 93     | 88/5       |
| 5               |                                                                                     | <b>II</b> |                                                                                           | 24     | 24/0       |
| 6 <sup>a</sup>  |                                                                                     |           |                                                                                           | 41     | 41/0       |
| 7               |   | <b>I</b>  |                                                                                           | 100    | 58/7/26/9  |
| 8 <sup>a</sup>  |                                                                                     | <b>II</b> | <br>    | 40     | 2/38/0/0   |
| 9               |  | <b>I</b>  |                                                                                         | 65     | 47/10/8    |
| 10 <sup>a</sup> |                                                                                     | <b>II</b> | <br> | 35     | 30/2/3     |
| 11              |  | <b>I</b>  |                                                                                         | 100    | 12/85/3    |
| 12 <sup>a</sup> |                                                                                     | <b>II</b> |                                                                                         | 100    | 7/92/1     |
| 13              |  | <b>I</b>  |                                                                                         | 25     | 22/3       |
| 14 <sup>a</sup> |                                                                                     | <b>II</b> |                                                                                         | 11     | 101        |
| 15              |  | <b>I</b>  |                                                                                         | 96     | 76/20      |
| 16              |                                                                                     | <b>II</b> |                                                                                         | 45     | 44/1       |
| 17 <sup>a</sup> |                                                                                     |           |                                                                                         | 95     | 94/1       |
| 18              |  | <b>I</b>  |                                                                                         | 45     | 41/4       |
| 19              |                                                                                     | <b>II</b> |                                                                                         | 24     | 16/8       |
| 20 <sup>a</sup> |                                                                                     |           |                                                                                         | 52     | 47/5       |
| 21              |                                                                                     | <b>I</b>  |                                                                                                                                                                            | 57     | 52/5       |

|                 |                                                                                   |           |                                                                                    |     |            |
|-----------------|-----------------------------------------------------------------------------------|-----------|------------------------------------------------------------------------------------|-----|------------|
| 22 <sup>a</sup> | 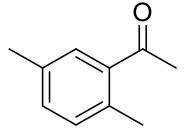 | <b>II</b> |  | 5   | 5          |
| 23              |  | <b>I</b>  |  | 65  | 3/56/3/3/0 |
| 24 <sup>a</sup> |                                                                                   | <b>II</b> |  | 98  | 0/96/0/0/2 |
| 25              |  | <b>I</b>  |  | 100 | 0/100/0/0  |
| 26              |                                                                                   | <b>II</b> |  | 100 | 0/61/2/37  |

GS-MS spectra of the hydrogenation reaction products:

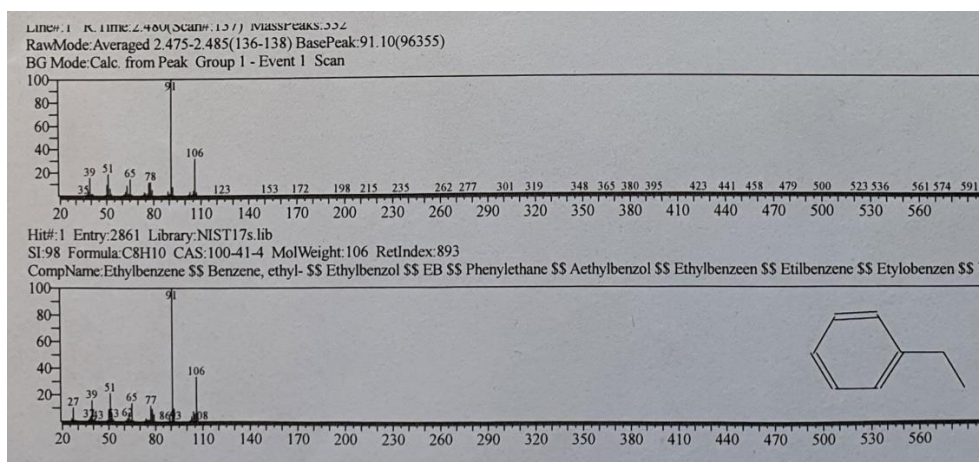

Figure S 10. MS spectra of Ethylbenzene



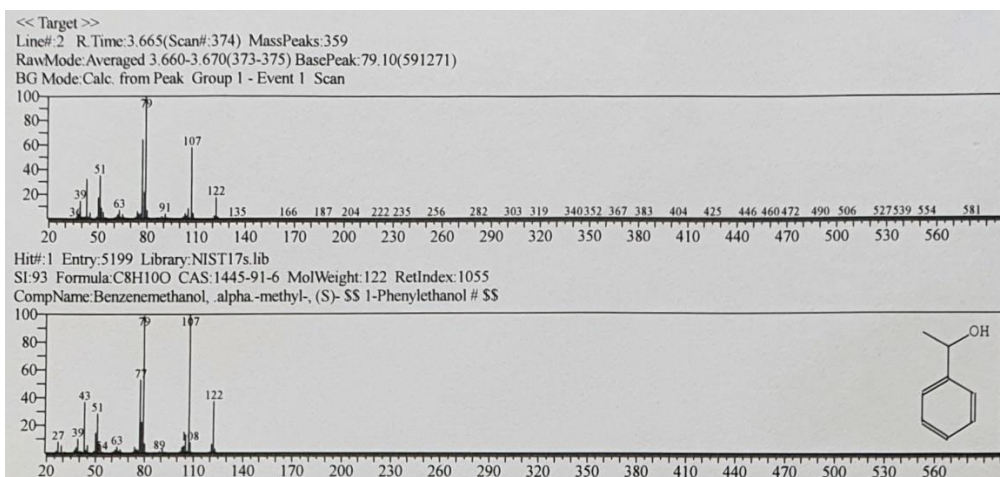

Figure S 11. MS spectra of 1-phenylethanol

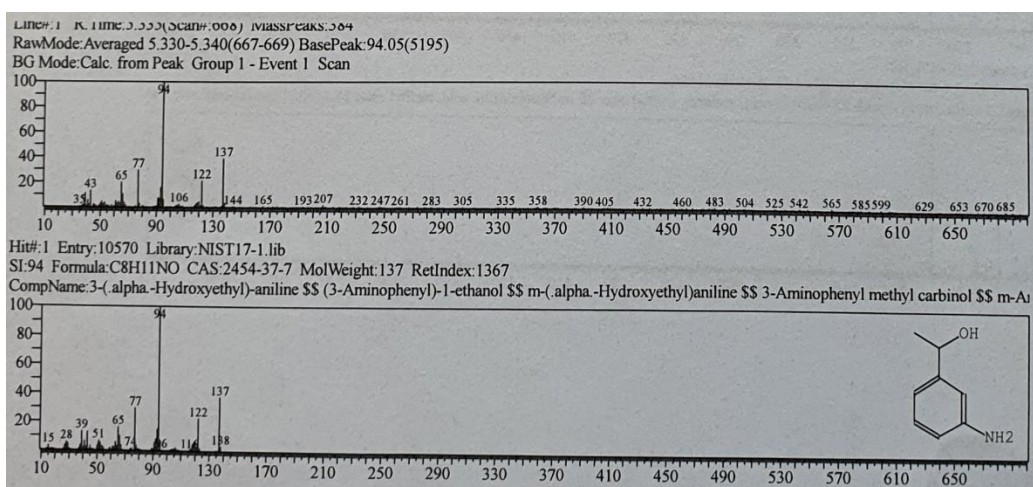

Figure S 12. MS spectra of 1-(3-Aminophenyl)ethanol

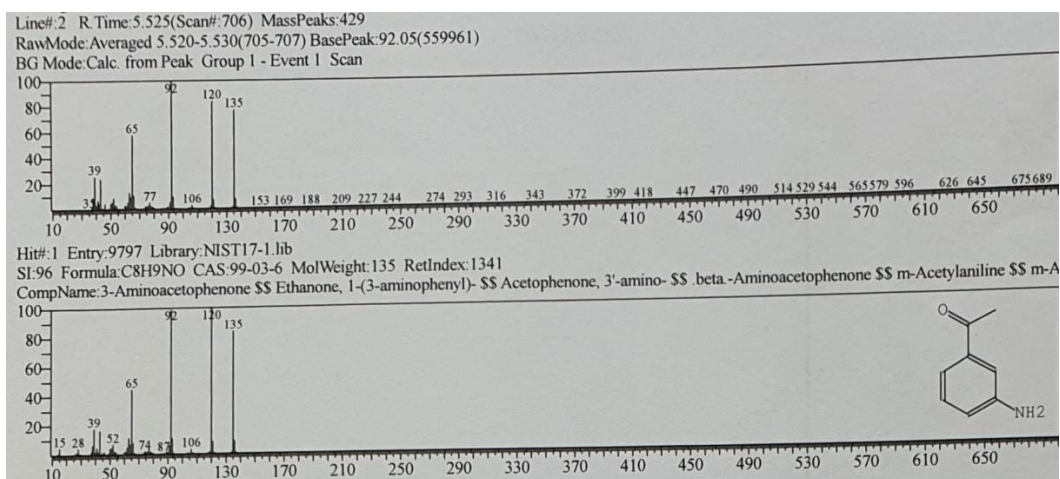

Figure S 13. MS spectra of 3-Aminoacetophenone

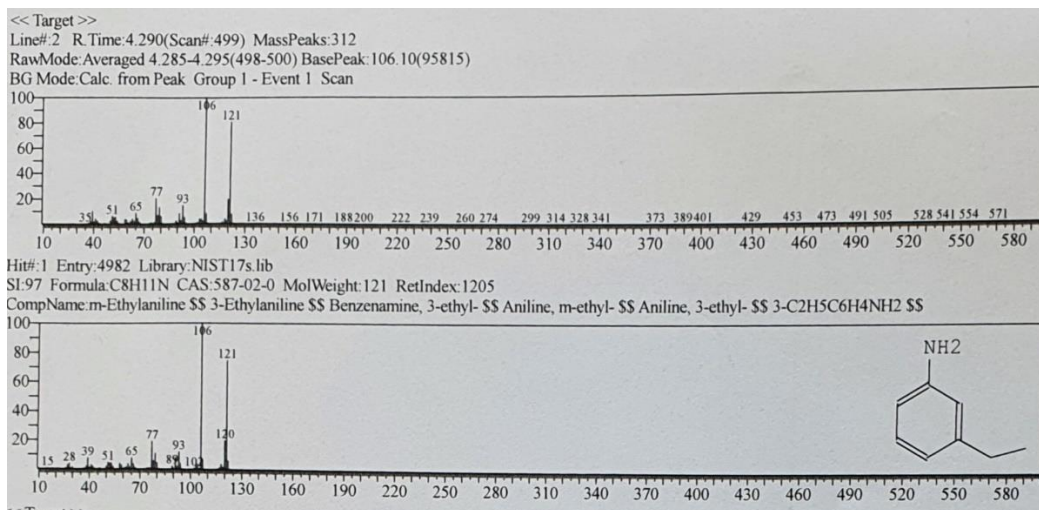

Figure S 14. MS spectra of 3-Ethylaniline

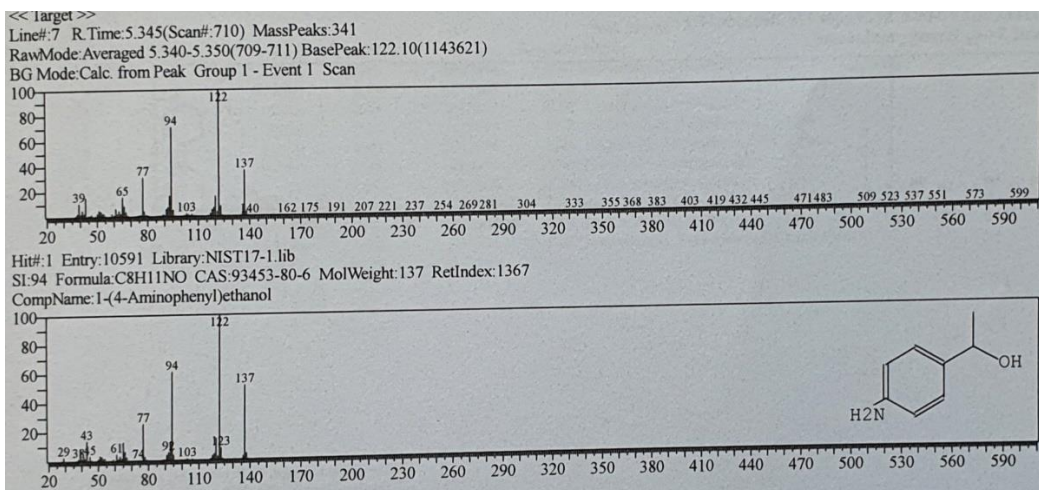

Figure S 15. MS spectra of 1-(4-Aminophenyl)ethanol

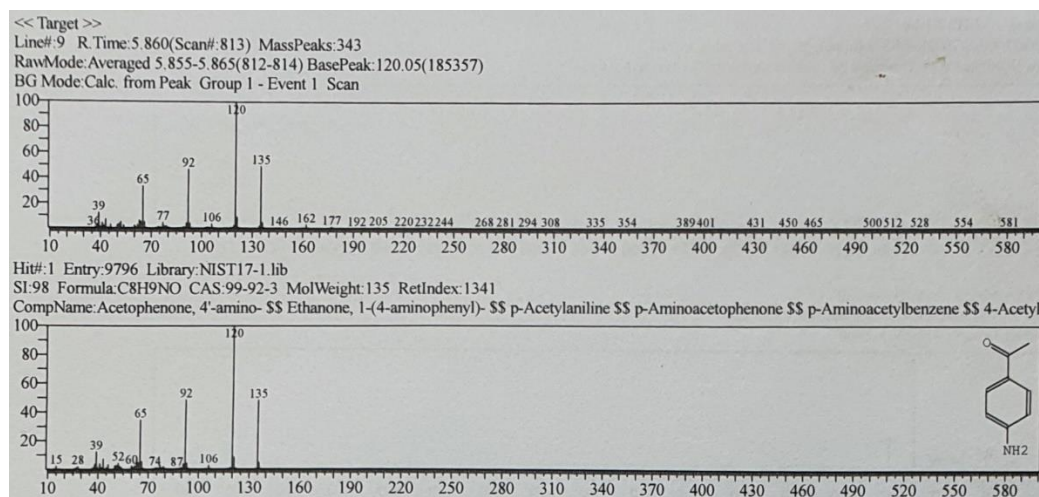

Figure S 16. MS spectra of 4-Aminoacetophenone

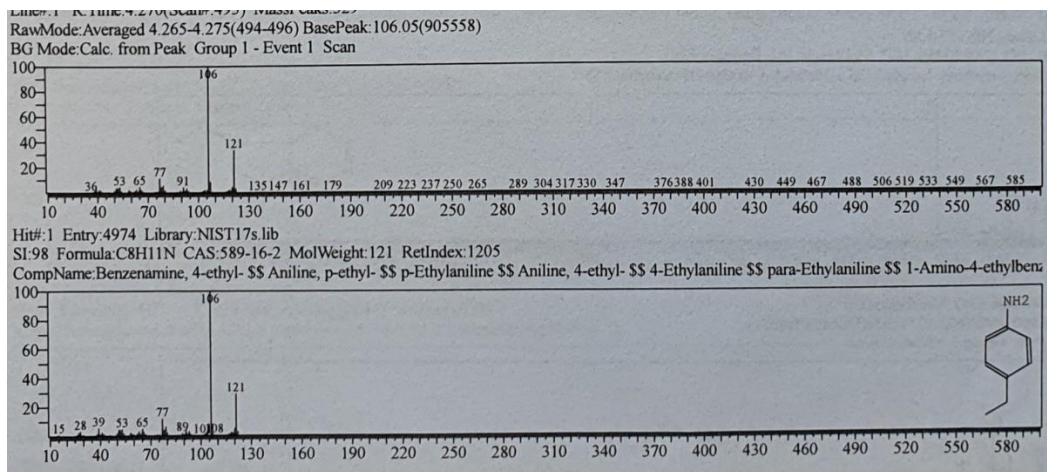

Figure S 17. MS spectra of 4-Ethylaniline

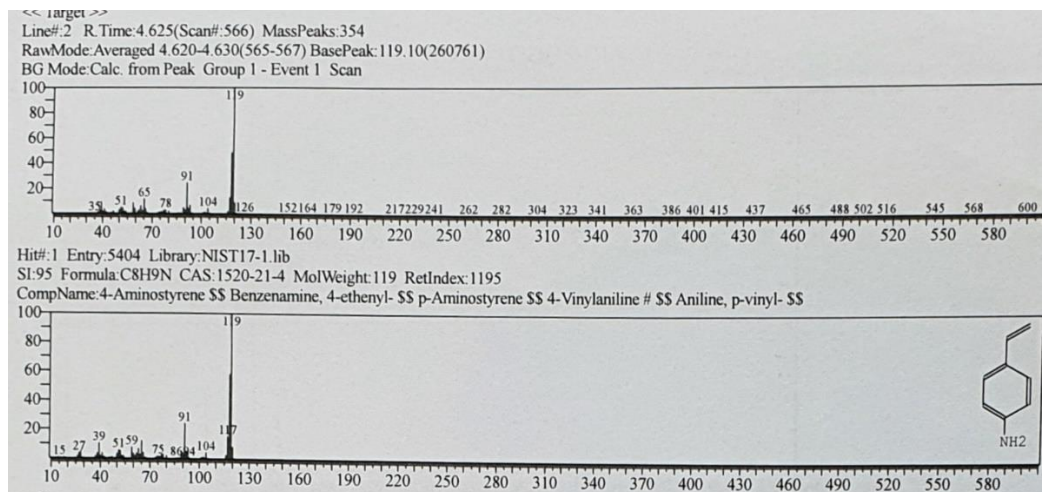

Figure S 18. MS spectra of 4-Aminostyrene

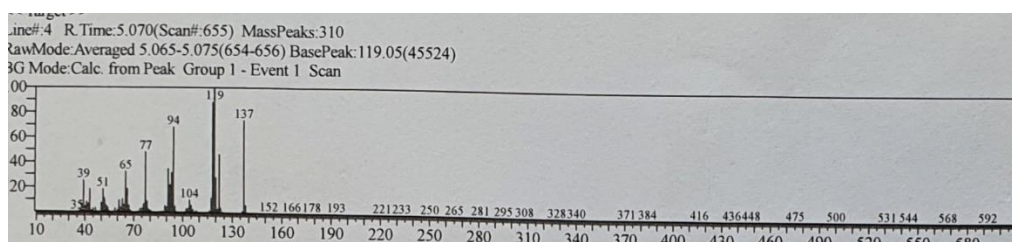

Figure S 19. MS spectra of 1-(2-Aminophenyl)ethanol

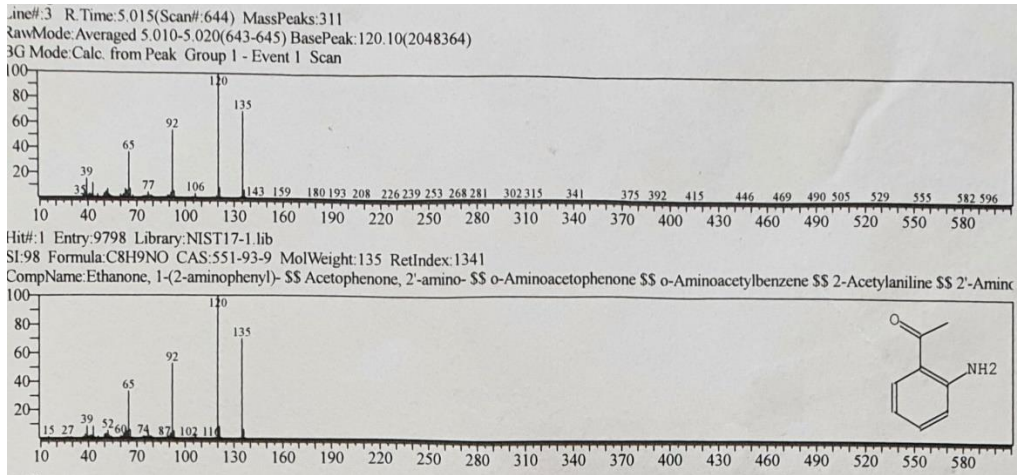

Figure S 20. MS spectra of 2-Aminoacetophenone

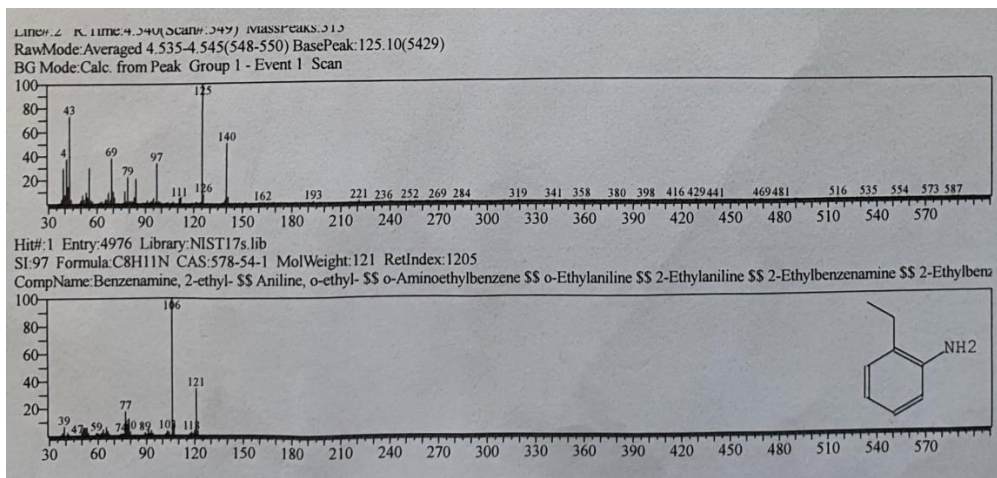

Figure S 21. MS spectra of 2-Ethylaniline

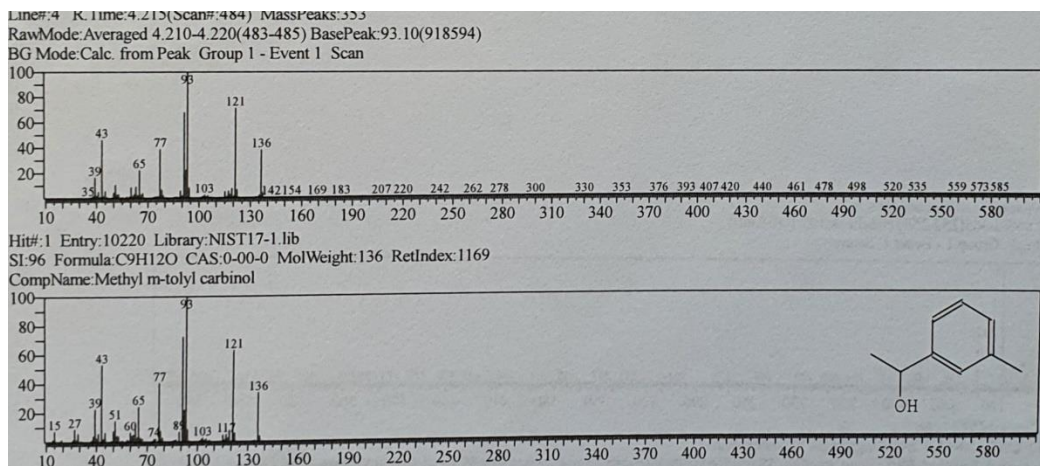

Figure S 22. MS spectra of 1-(3-Methylphenyl)ethanol

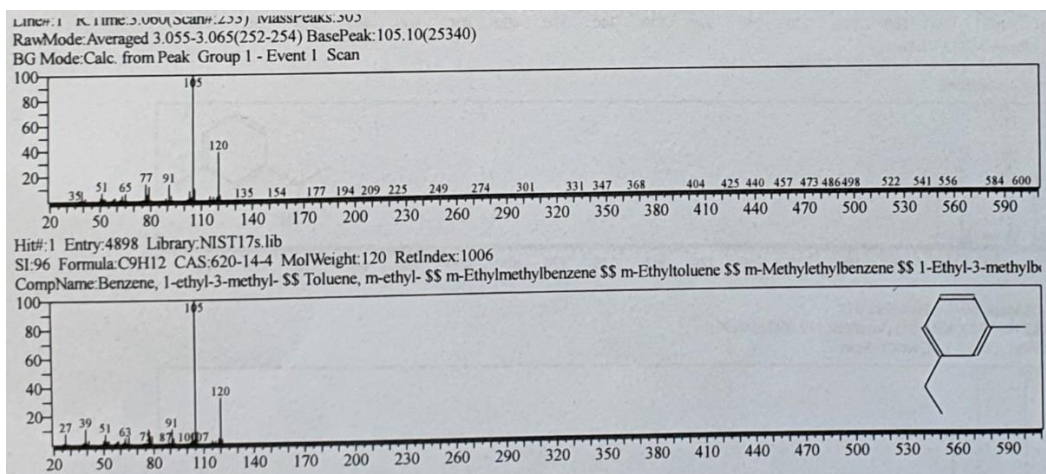

Figure S 23. MS spectra of 3-Ethyltoluene

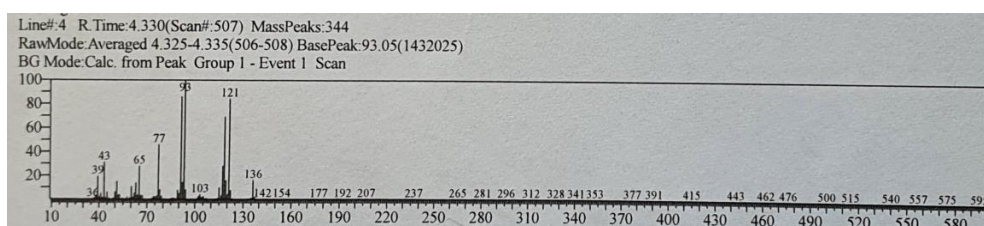

Figure S 24. MS spectra of 1-(2-Methylphenyl)ethanol

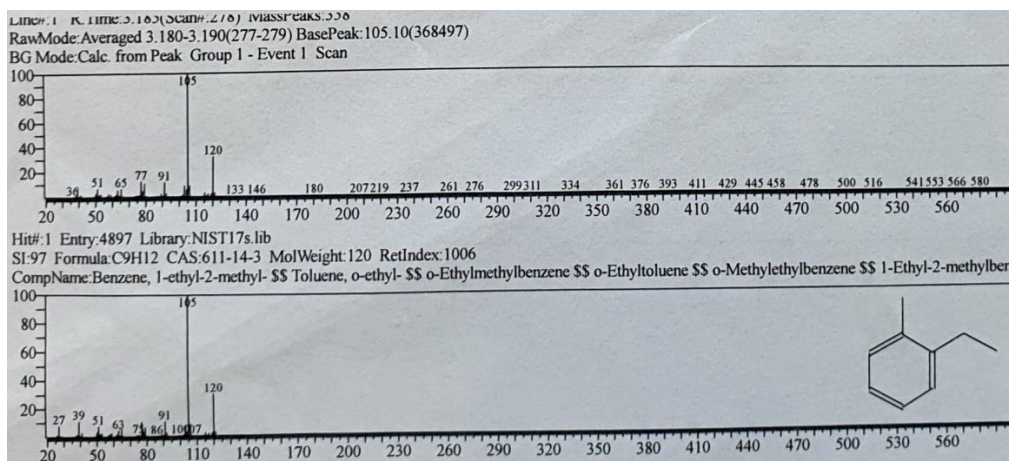

Figure S 25. MS spectra of 3-Ethyltoluene

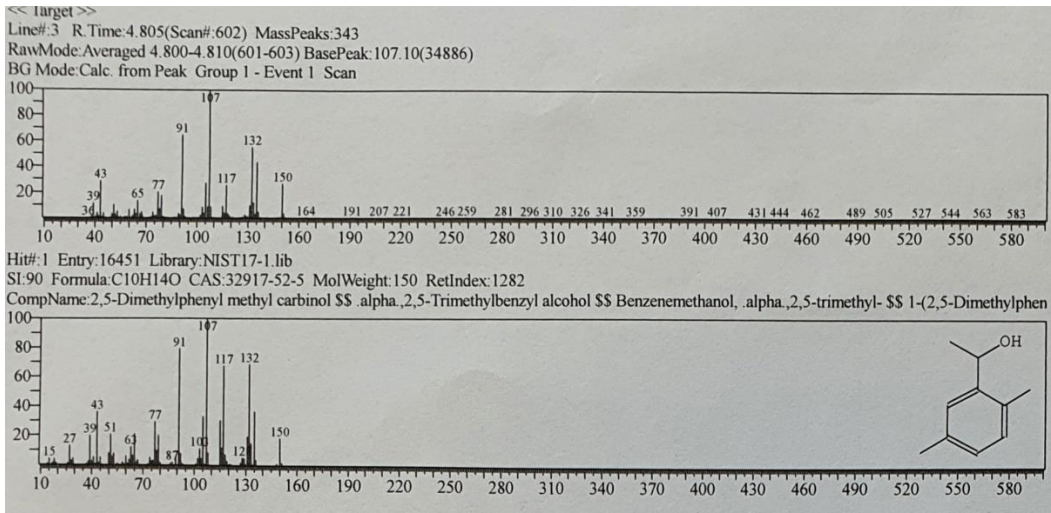

Figure S 26. MS spectra of 1-(2,5-Dimethylphenyl)ethanol

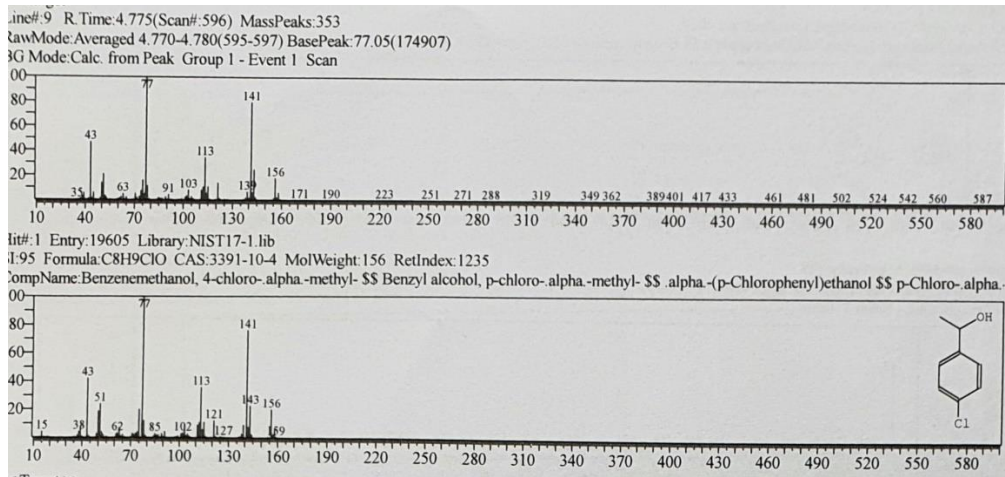

Figure S 27. MS spectra of 1-(4-Chlorophenyl)ethanol

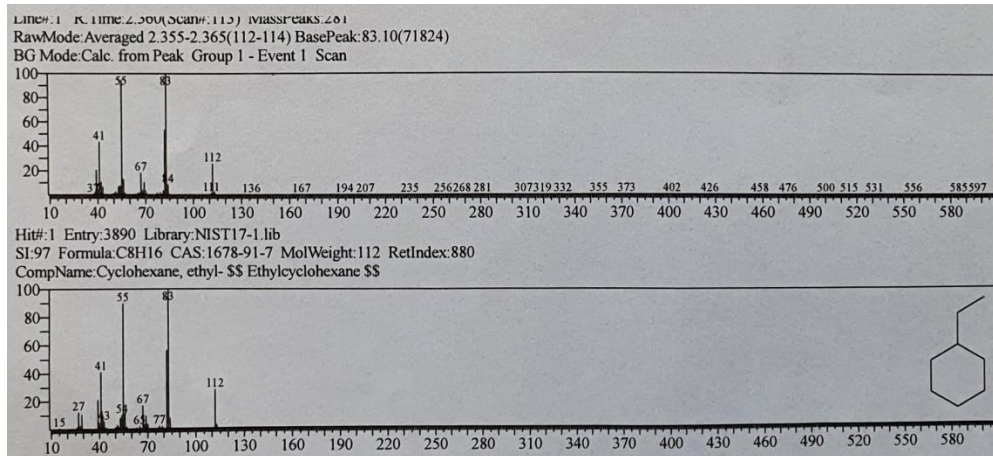

Figure S 28. MS spectra of ethylcyclohexane
